# Supplementary material
Source: PubMed Central journal article supplement (PMC3577994)
Supplement: NIHMS419693-supplement-supplement_1.pdf [file NIHMS419693-supplement-supplement_1.pdf]

Table I Online: Comparisons of demographics between the subset included in the current analysis (sample A) and to the rest of the cohort (sample B).

|                              |                 | Samples           |                   | Overall           |
|------------------------------|-----------------|-------------------|-------------------|-------------------|
|                              |                 | A (n=5,119)       | B (n=10,092)      | (n=15,211)        |
| Sex                          | Male            | 48.8              | 53                | 51.5              |
|                              | Female          | 51.2              | 47                | 48.5              |
| Ethnicity                    | White           | 96.4              | 94                | 95                |
|                              | Non-white       | 3.6               | 6                 | 5                 |
| Type of school child attends | Primary         | 92.2              | 91.5              | 91.9              |
|                              | Private         | 5.6               | 4.8               | 5.3               |
|                              | Special         | -                 | 1.1               | 0.5               |
|                              | Other           | 2.2               | 2.6               | 2.4               |
| Literacy based interaction   | High            | 46.1              | 44.3              | 45.4              |
|                              | Moderate        | 46.3              | 47.3              | 46.7              |
|                              | Low             | 7.6               | 8.5               | 7.9               |
| Verbal based interaction     | High            | 65.6              | 64.4              | 65.5              |
|                              | Moderate        | 29.8              | 29.2              | 29.5              |
|                              | Low             | 4.6               | 5.4               | 5                 |
| Marital status               | Married         | 83.8              | 76                | 80.2              |
| ADHD                         | Yes             | 1.5               | 2.9               | 2.1               |
| Gestational age              | ≥37wks          | 95.3              | 82.3              | 86.7              |
|                              | ≤36wks          | 4.8               | 17.7              | 13.3              |
| Social class - Maternal      | Manual          | 14.1              | 24.3              | 19.9              |
|                              | Non-manual      | 85.9              | 75.7              | 80.1              |
| Antenatal class attendance   |                 | 67.4              | 54.7              | 60                |
| Alcohol consumption          | Never           | 43.6              | 46.7              | 45.5              |
|                              | <1 glass PWK    | 40.7              | 37.5              | 38.7              |
|                              | 1+ glasses PWK  | 14.1              | 13.7              | 13.9              |
|                              | 1+ glasses PDAY | 1.6               | 2.1               | 1.9               |
| Resuscitation                |                 | 8                 | 10                | 9.2               |
| Birth weight gm              |                 | 3443.2<br>(516.7) | 3346.1<br>(611.9) | 3381.5<br>(580.8) |
| Mother's age at delivery     |                 | 29.4<br>(4.5)     | 25.4<br>(8.5)     | 26.8<br>(7.6)     |



Table IV Online: Descriptive statistics of the seven reading skill outcomes across the prenatal nicotine exposure categories.

| Variable                   | Nicotine exposure | N    | Mean  | SD   |
|----------------------------|-------------------|------|-------|------|
| Reading speed              | None              | 3756 | 107   | 11.8 |
|                            | Low               | 593  | 105.3 | 12.4 |
|                            | High              | 138  | 100.4 | 13.2 |
|                            | Overall           | 4487 | 106.5 | 12.0 |
| Single-word identification | None              | 4151 | 29.4  | 8.7  |
|                            | Low               | 656  | 28.4  | 8.7  |
|                            | High              | 150  | 25.6  | 9.5  |
|                            | Overall           | 4957 | 29.2  | 8.7  |
| Spelling                   | None              | 4094 | 0.1   | 0.9  |
|                            | Low               | 644  | 0.02  | 0.9  |
|                            | High              | 150  | -0.3  | 1.0  |
|                            | Overall           | 4888 | 0.1   | 0.9  |
| Accuracy                   | None              | 3764 | 106.0 | 12.9 |
|                            | Low               | 593  | 104.1 | 12.8 |
|                            | High              | 139  | 98.7  | 13.6 |
|                            | Overall           | 4496 | 105.5 | 13.0 |
| Real words reading         | None              | 4184 | 7.8   | 2.2  |
|                            | Low               | 655  | 7.6   | 2.3  |
|                            | High              | 150  | 6.8   | 2.9  |
|                            | Overall           | 4989 | 7.8   | 2.3  |
| Nonword reading            | None              | 4181 | 5.4   | 2.4  |
|                            | Low               | 654  | 5.4   | 2.4  |
|                            | High              | 150  | 4.9   | 2.5  |
|                            | Overall           | 4985 | 5.4   | 2.4  |
| Comprehension              | None              | 3764 | 102.3 | 11.2 |
|                            | Low               | 593  | 100.2 | 11.2 |
|                            | High              | 139  | 95.4  | 11.0 |
|                            | Overall           | 4496 | 101.7 | 11.3 |
